# Supplementary material for: Characterization of transcriptional enhancers in the chicken genome using CRISPR-mediated activation
Source: Front Genome Ed. 2023 Oct 25;5:1269115. doi: 10.3389/fgeed.2023.1269115 (PMC10634339; doi:10.3389/fgeed.2023.1269115)
Supplement: Supplementary file 1 [file Table2.XLSX]

## Sheet: Sheet1
Supplementary Table 2. Primers for qRT-PCR
Gene	Sequence (5'-3')
GAPDH	F: GGTGGTGCTAAGCGTGTTAT
	R: ACCTCTGCCATCTCTCCACA
HBBA	F: TCCTCATCATTGTCCTGGCC
	R: GCATGCAATGGTTGTAGGTG
IRF7	F: GAAAGCCACCGCCGCTCTAT
	R: ACGCACTTCTTACACACCTCC
PPARG	F: GCCAGTTATTCACTTGACTGCAC
	R: CCATCCACTTCTTTTGCTGGTG
