# Supplementary material for: Characterization of transcriptional enhancers in the chicken genome using CRISPR-mediated activation
Source: Front Genome Ed. 2023 Oct 25;5:1269115. doi: 10.3389/fgeed.2023.1269115 (PMC10634339; doi:10.3389/fgeed.2023.1269115)
Supplement: Supplementary file 2 [file Table1.XLSX]

## Sheet: Sheet1
Supplementary Table 1. Putative regulatory elements and targeting gRNAs
Gene	Regulatory Element	Location (galGal6)	Name	Sequence (5’ – 3’)
HBBA	Promoter	Chr1:197,281,448-197,282,146	P 1	GATAAAAGTGGGGACACAGA
			P 2	GCAATTGGCTGCATCTCCAG
			P 3	AGGGAACGCGGCATCAGGGT
			P 4	GGTGGTGTGGCCACGGATCT
	Enhancer	Chr1: 197,295,884-197,296,232	E1-1	CTGGGAGCTCCTTGCGCCGA
			E1-2	CCATGGGGCGATAACACGGC
			E1-3	AGCACTAAATATTTTTCGGT
			E1-4	GGCCCCCCGTTACTCAGCAA
		Chr1:197,293,540-197,294,001	E2-1	GGCACACTGCAATGGACTCC
			E2-2	GCTGCGCGGCAGCTGATAGG
			E2-3	TCTCGTCGTTTTGCTCAGGG
			E2-4	TCTCGTCGTTTTGCTCAGGG
IRF7	Promoter	Chr5:16,052,832-16,053,254	P 1	GAAACTGAAACCGCTCCGGT
	Enhancer	Chr5:16,046,526-16,046,948	E1-1	GTAAAAATCTCACACTACGG
			E1-2	AGAGGAACTTAGGATGCAGA
			E1-3	GTAAGACAAGAGCATGCCCT
		Chr5:16,047,895-16,048,317	E2-1	GGTTGCCACCGGCACACCGC
			E2-2	AGTTCGGAAAGGCTCCTGGA
			E2-3	CAGGTATACCACGTCTACAC
		Chr5:16,055,879-16,056,301	E3-1	TACCAGTACTCGCAGAACTG
			E3-2	ATTGCTCGATAAGCTCGAAG
			E3-3	GGCTCCACTGGGTCAGGCTT
PPARG	Promoter	Chr12:5,237,669-5,238,822	P 1	CGTTCGCTCTTCGAACGCCC
			P 2	CCGAGGGGCGAGCTCGCGCC
			P 3	CGGTGCCTGGCCGGTAGGAT
	Enhancer	Chr12:5,247,239-5,247,526	E1-1	TATCTCATCAGCATAGACGT
			E1-2	TGCGATACGGGCAGATTACC
			E1-3	CCCTTGGTGGTCAGTAAGAC
		Chr12:5,252,103-5,256,539	E2-1	CATGCCTAATTGCATTGCTA
			E2-2	AGTGTCTACAAGATTCTAAA
			E2-3	TGCCTCAATACAAATTCTCA
		Chr12:5,277,950-5,278,526	E3-1	CCTAATAAAATACTTGAAAC
			E3-2	ATATTGTGGAAGATAACCTC
			E3-3	TATGATAACATGCTACAATA
		Chr12:5,295,125-5,296,278	E4-1	TTCTTGCATCAACCTAGCAC
			E4-2	TGAGTGAGGCTTGAATGATA
			E4-3	GATCTTCAGGTTGAATTGAC
